# Supplementary material for: Self-crosslinkable polymers from furan-functionalized Meldrum's acid and maleimides as effective precursors of free-standing and flexible crosslinked polymer films showing low dielectric constants
Source: Royal Society of Chemistry journal article supplement (doi:10.1039/c9py01709g), 2020-01-01
Supplement: c9py01709g1.pdf [file c9py01709g1.pdf]

## Electronic supplementary information (ESI)

**Self-crosslinkable polymers from furan-functionalized Meldrum's acid and maleimides as effective precursors of free-standing and flexible crosslinked polymer films showing low dielectric constants**

Chien-Ho Huang and Ying-Ling Liu\*

Department of Chemical Engineering, National Tsing Hua University,

No. 101, Sec. 2, Kuang-Fu Road, Hsinchu, 30013, Taiwan.

\*E-mail: [liuyl@mx.nthu.edu.tw](mailto:liuyl@mx.nthu.edu.tw)

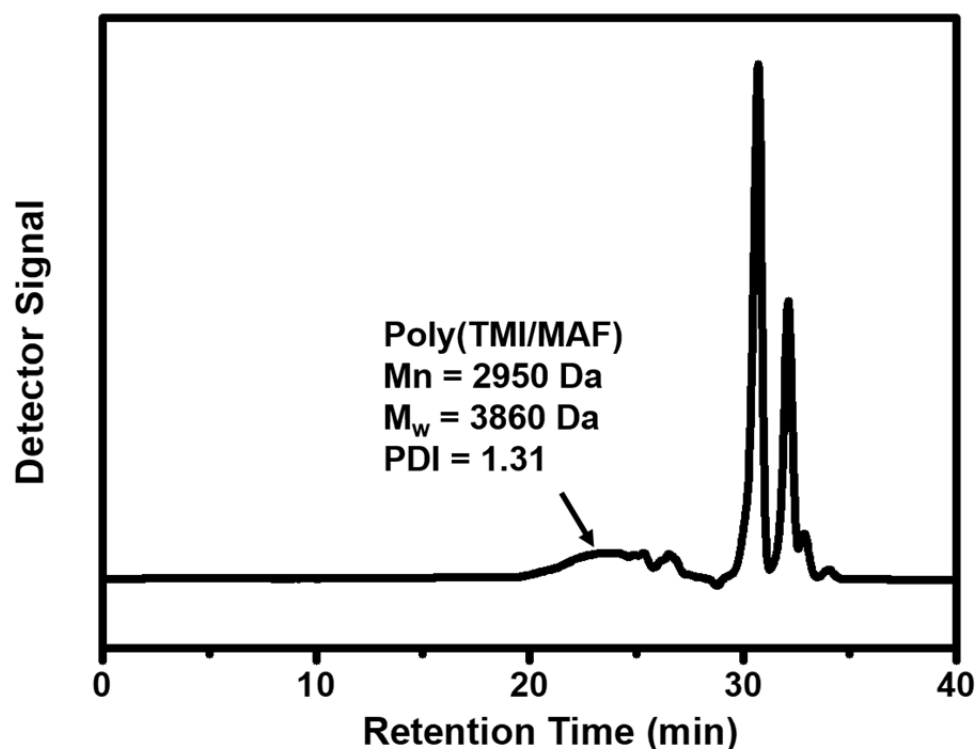

*Figure S1. Molecular weights of Poly(TMI/MAF) was measured with a Gel permeation chromatography (GPC) using tetrahydrofuran as the mobile phase at a flow rate of 1 mL min<sup>-1</sup>, which was equipped with a Waters 1515 isocratic pump, Waters 2414 refractive index detector, and Waters styragel HR4/HR3 columns. Monodispersed polystyrenes in various molecular weights were used as calibration standards.*

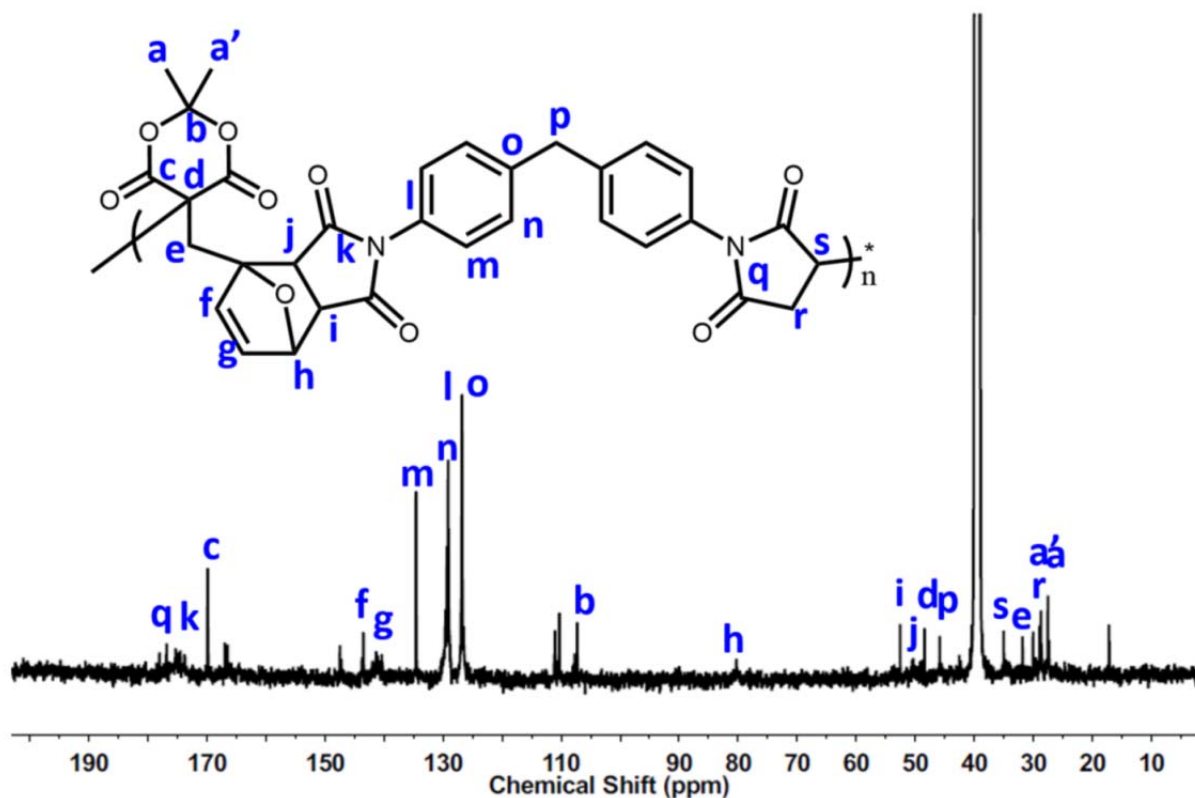

Figure S2.  $^{13}\text{C}$ -NMR spectra of a Poly(BMI-II/MAF).

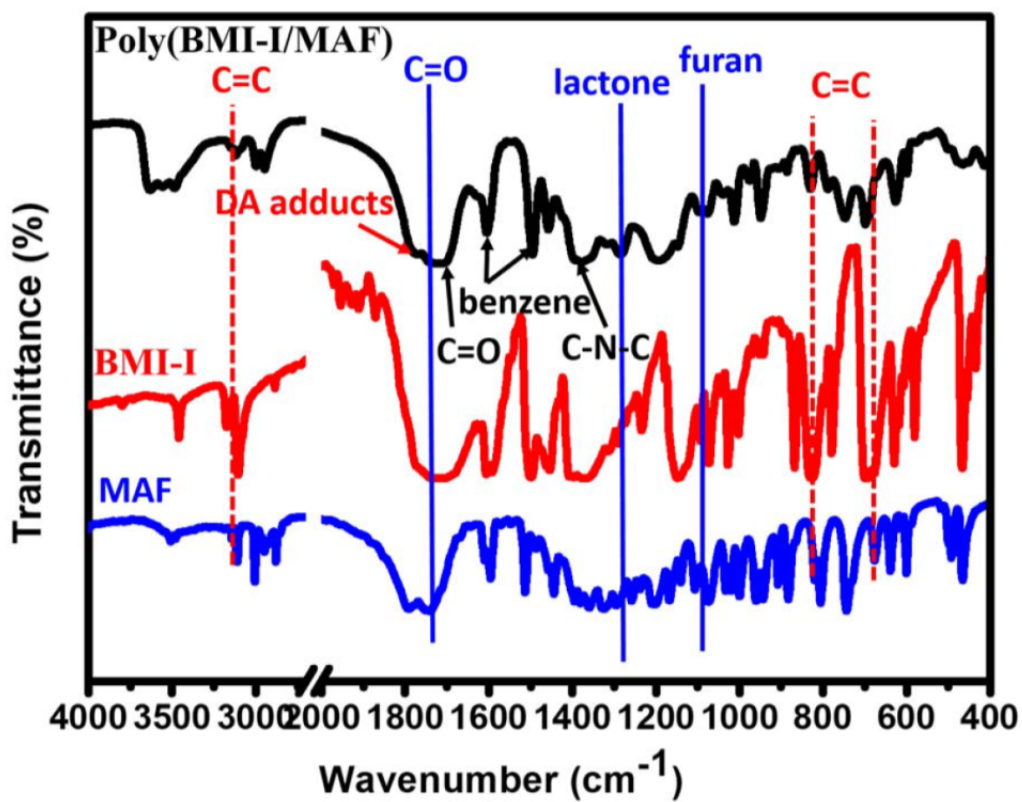

Figure S3. FTIR spectra of a Poly(BMI-I/MAF).

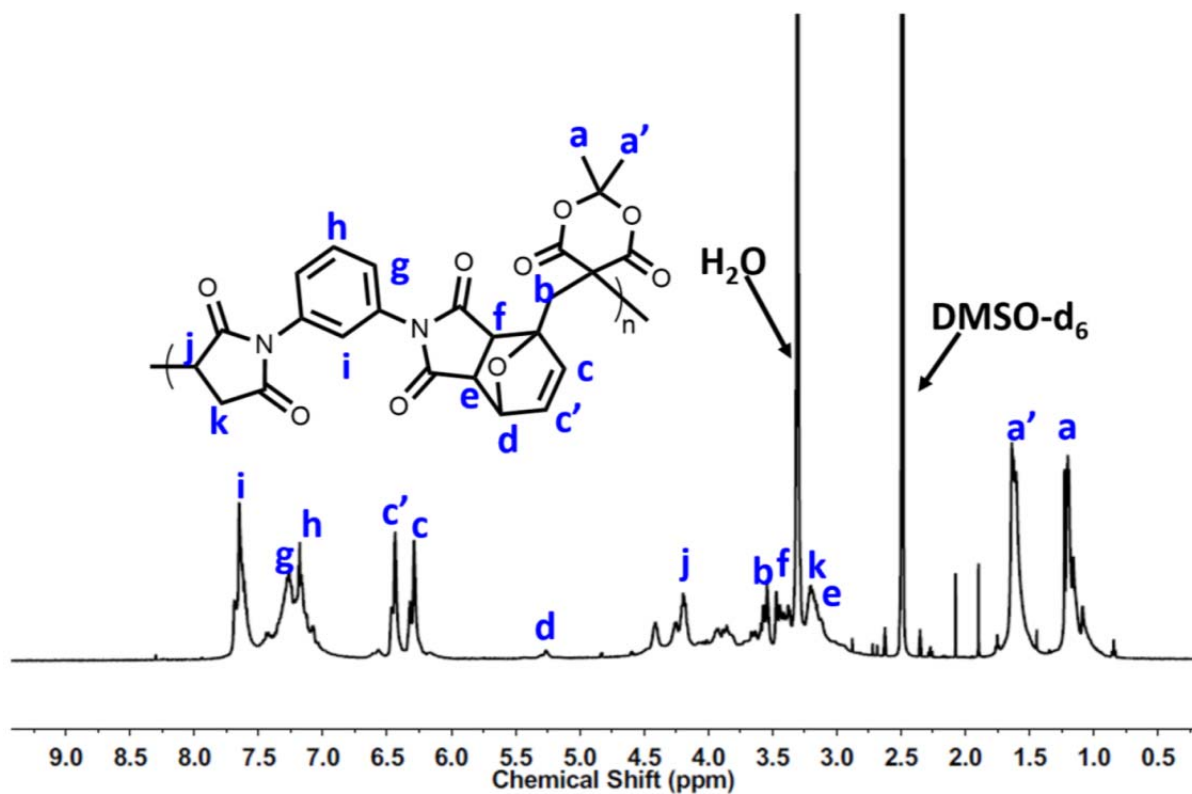

Figure S4.  $^1\text{H}$ -NMR spectra of a Poly(BMI-I/MAF).

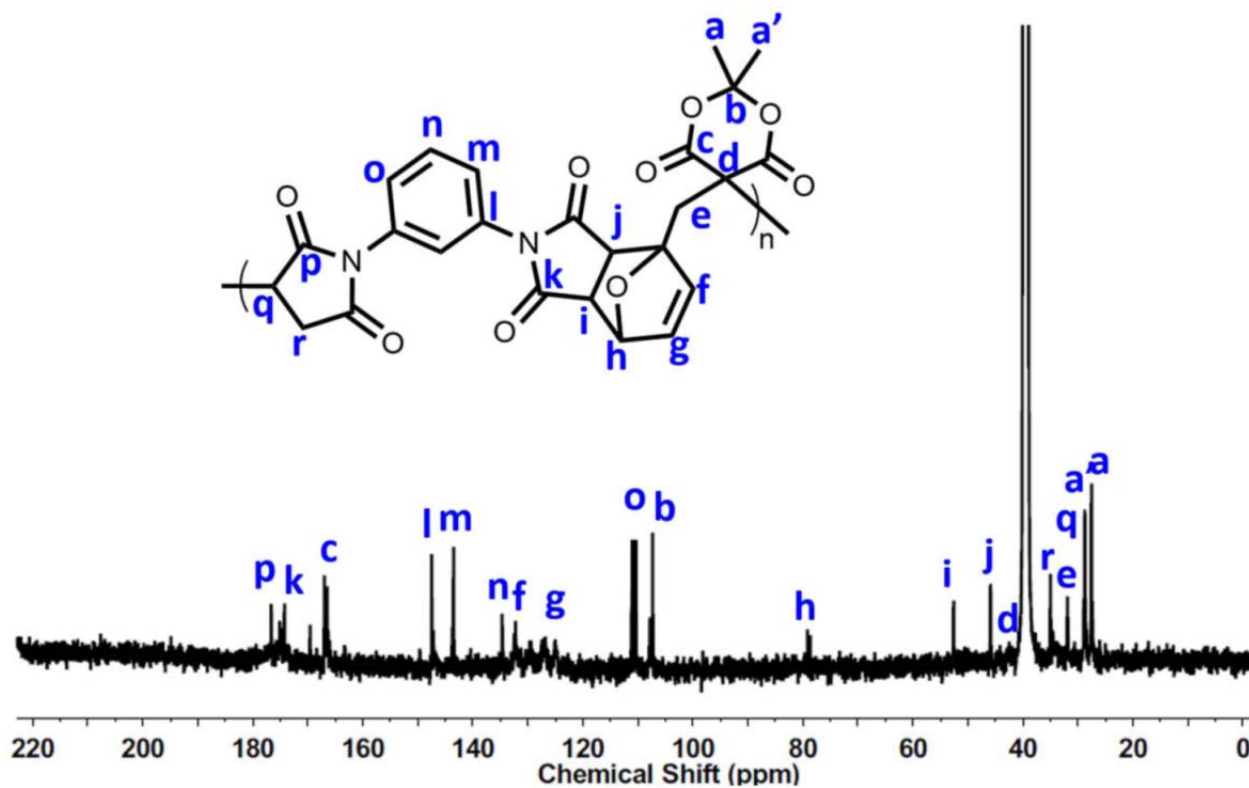

Figure S5.  $^{13}\text{C}$ -NMR spectra of a Poly(BMI-I/MAF).

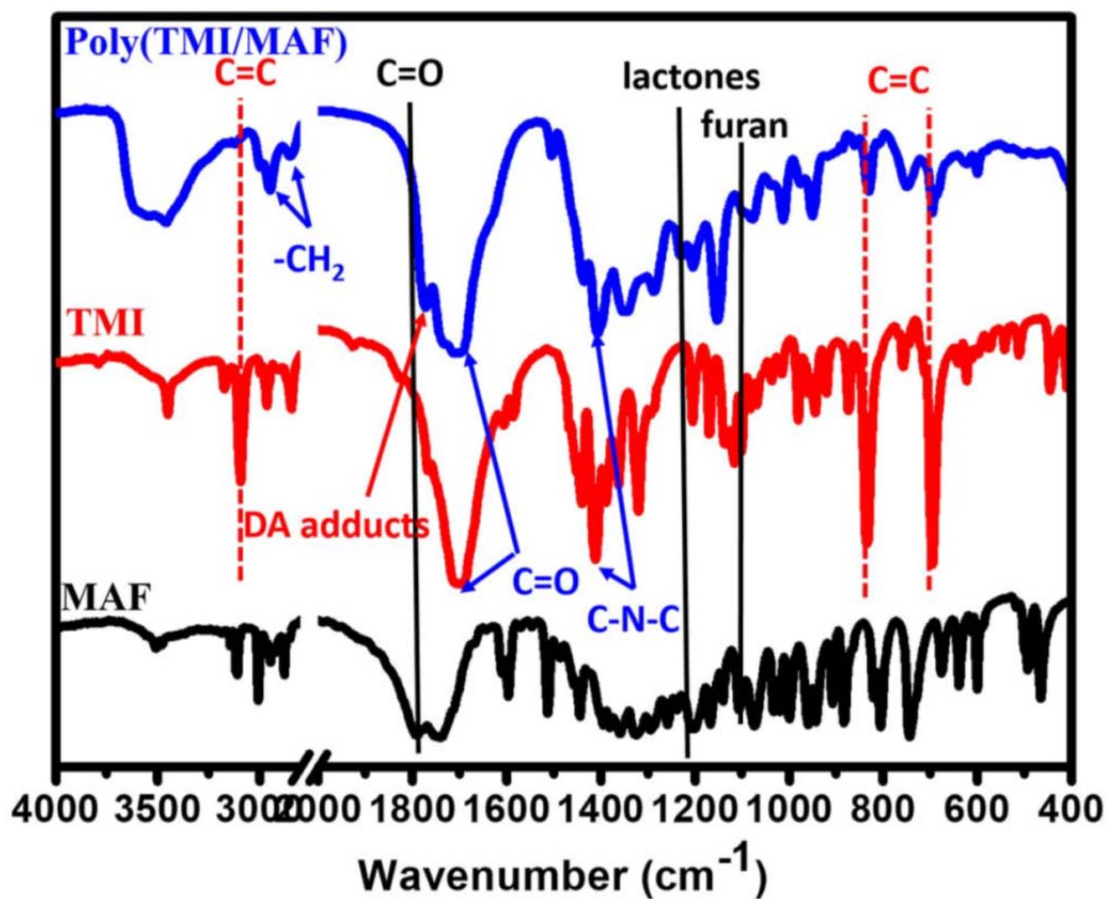

Figure S6. FTIR spectra of a Poly(TMI/MAF).

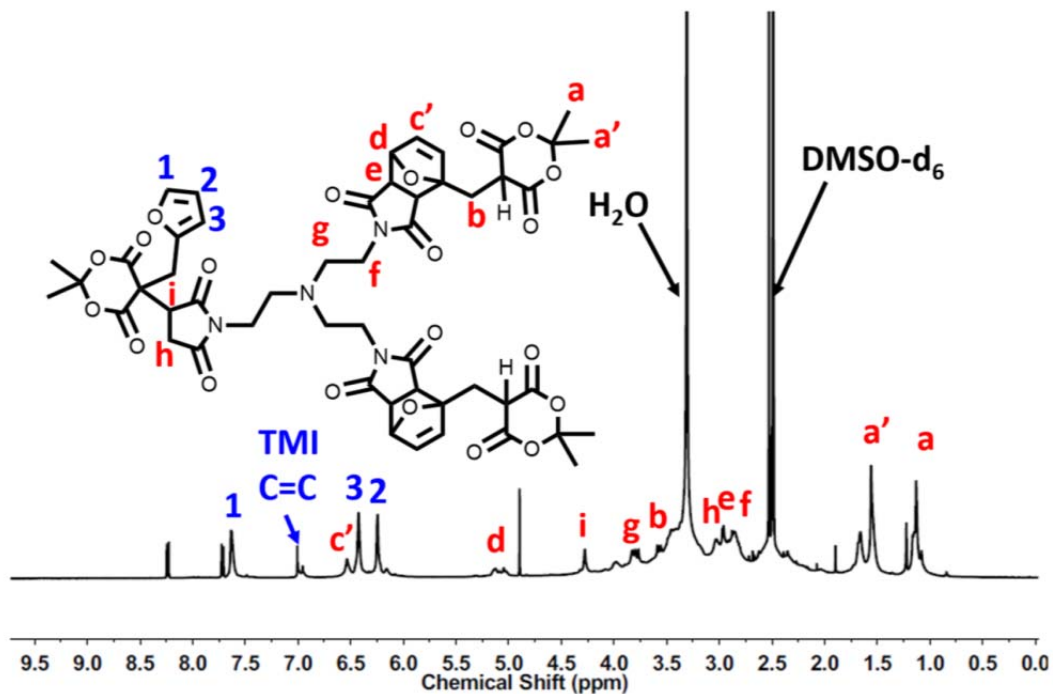

Figure S7. <sup>1</sup>H-NMR spectra of a Poly(TMI/MAF).

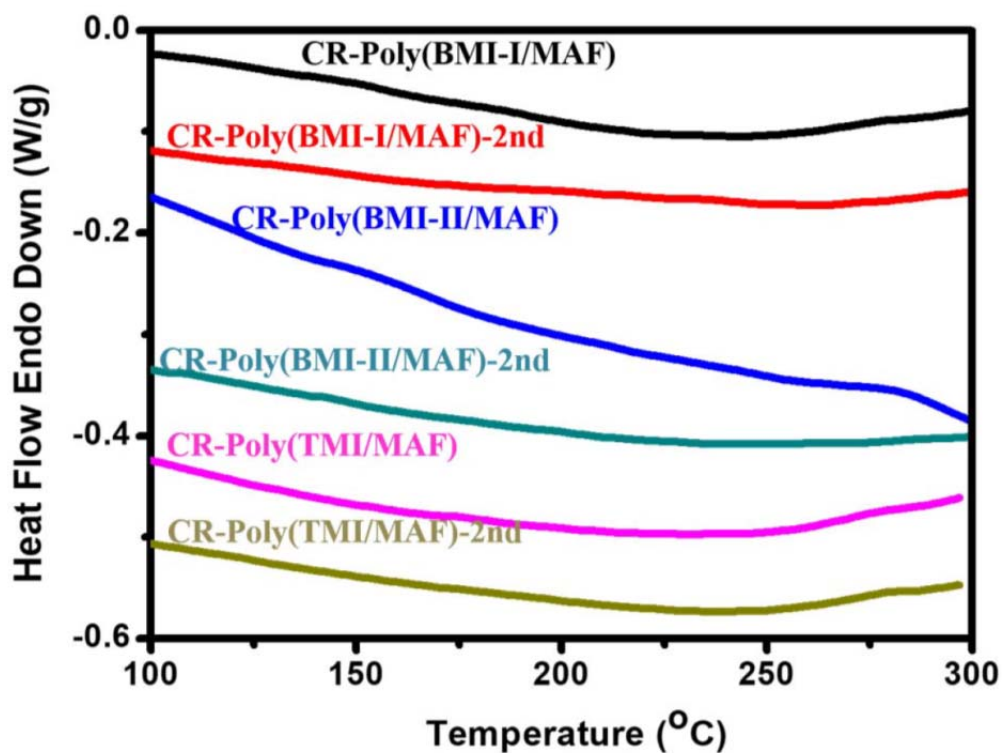

*Figure S8. DSC thermograms of the corresponding crosslinked samples of MAF-based polymers.*

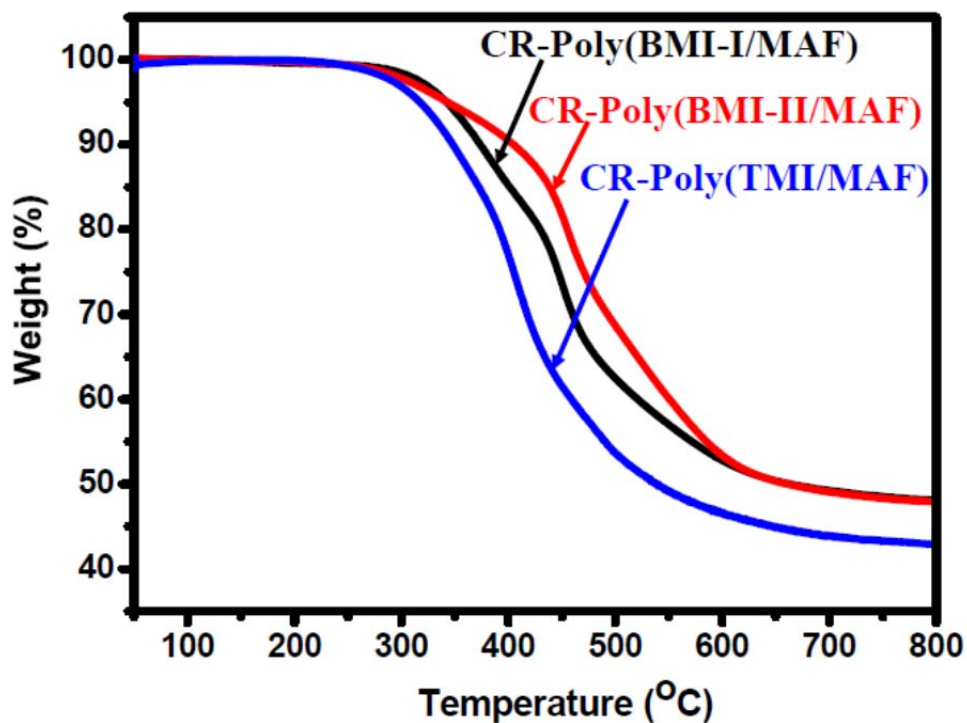

*Figure S9. TGA thermograms of the corresponding crosslinked samples of MAF-based polymers.*
